# Supplementary material for: Differential effects of guided imagery and progressive muscle relaxation on physical and emotional symptoms in nursing students taking initial clinical training: A randomized clinical trial
Source: PubMed Central journal article supplement — Heliyon. 2022 Oct 19;8(10):e11147. doi: 10.1016/j.heliyon.2022.e11147 (PMC9614822; doi:10.1016/j.heliyon.2022.e11147), 2022-10-19
Supplement: mmc1.pdf [file mmc1.pdf]

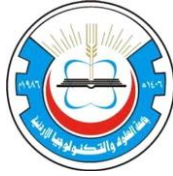

**Jordan University of Science and Technology**

**Participant Questionnaire**

**Participant Code:**

**Sociodemographic Characteristics**

**1. Gender**

Female                       Male

**2. Marital Status**

Single                       Married                       Divorced

**3. Employment Status**

Employed                       Unemployed

**4. Smoking Status**

Yes                       No

**5. The number of cigarettes per day: .....**

**6. Age: .....**

**7. The number of sleeping hours per day: .....**

## Physical Symptoms

*During the past 4 weeks, how much have you been bothered by any of the following problems?*

|    |                                                              | Not bothered at all (0) | Bothered a little (1) | Bothered a lot (2) |
|----|--------------------------------------------------------------|-------------------------|-----------------------|--------------------|
| 1  | Stomach pain                                                 |                         |                       |                    |
| 2  | Back pain                                                    |                         |                       |                    |
| 3  | Pain in your arms, legs, or joints (Knee, hip, etc.)         |                         |                       |                    |
| 4  | Menstrual cramps or other problems with periods (women only) |                         |                       |                    |
| 5  | Headache                                                     |                         |                       |                    |
| 6  | Chest pain                                                   |                         |                       |                    |
| 7  | Dizziness                                                    |                         |                       |                    |
| 8  | Fainting spells                                              |                         |                       |                    |
| 9  | Feeling your heart pound or race                             |                         |                       |                    |
| 10 | Shortness of breath                                          |                         |                       |                    |
| 11 | Pain or problems during sexual intercourse                   |                         |                       |                    |
| 12 | Constipation                                                 |                         |                       |                    |
| 13 | Nausea, gas, or indigestion                                  |                         |                       |                    |
| 14 | Feeling tired or having low energy                           |                         |                       |                    |
| 15 | Trouble sleeping                                             |                         |                       |                    |

## Emotional Symptoms

*Please read each statement and press a response that indicates how much the statement applied to you over the past week. There are no right or wrong answers. Do not spend too much time on any statement.*

NEVER - Did not apply to me at all

SOMETIMES - Applied to me to some degree, or some of the time

OFTEN - Applied to me to a considerable degree, or a good part of time

ALMOST ALWAYS - Applied to me very much, or most of the time

|    |                                                                                                                                    | NEVER | SOMETIMES | OFTEN | ALMOST ALWAYS |
|----|------------------------------------------------------------------------------------------------------------------------------------|-------|-----------|-------|---------------|
| 1  | I found it hard to wind down                                                                                                       |       |           |       |               |
| 2  | I was aware of dryness of my mouth                                                                                                 |       |           |       |               |
| 3  | I couldn't seem to experience any positive feeling at all                                                                          |       |           |       |               |
| 4  | I experienced breathing difficulty (eg, excessively rapid breathing, breathlessness in the absence of physical exertion)           |       |           |       |               |
| 5  | I found it difficult to work up the initiative to do things                                                                        |       |           |       |               |
| 6  | I tended to over-react to situations                                                                                               |       |           |       |               |
| 7  | I experienced trembling (eg, in the hands)                                                                                         |       |           |       |               |
| 8  | I felt that I was using a lot of nervous energy                                                                                    |       |           |       |               |
| 9  | I was worried about situations in which I might panic and make a fool of myself                                                    |       |           |       |               |
| 10 | I felt that I had nothing to look forward to                                                                                       |       |           |       |               |
| 11 | I found myself getting agitated                                                                                                    |       |           |       |               |
| 12 | I found it difficult to relax                                                                                                      |       |           |       |               |
| 13 | I felt down-hearted and blue                                                                                                       |       |           |       |               |
| 14 | I was intolerant of anything that kept me from getting on with what I was doing                                                    |       |           |       |               |
| 15 | I felt I was close to panic                                                                                                        |       |           |       |               |
| 16 | I was unable to become enthusiastic about anything                                                                                 |       |           |       |               |
| 17 | I felt I wasn't worth much as a person                                                                                             |       |           |       |               |
| 18 | I felt that I was rather touchy                                                                                                    |       |           |       |               |
| 19 | I was aware of the action of my heart in the absence of physical exertion (eg, sense of heart rate increase, heart missing a beat) |       |           |       |               |
| 20 | I felt scared without any good reason                                                                                              |       |           |       |               |
| 21 | I felt that life was meaningless                                                                                                   |       |           |       |               |

**Thank you for participating in the study!**
